# Supplementary material
Source: PubMed Central journal article supplement (PMC3378726)
Supplement: NIHMS361660-supplement-2.pdf [file NIHMS361660-supplement-2.pdf]

Supplement Content Legend for online publication:

Appendix. Table of VPS diagnoses that are considered complex chronic conditions according to Feudtner et al's ICD-9 list (18) and our modified list, as well as conditions considered non-complex chronic conditions.

Supplemental Table 4. Adjusted odds ratios for predictor variables in hierarchical logistic models of PICU mortality using PRISM III

Supplemental Table 5. Comparison of adjusted odds ratios for predictor variables in hierarchical logistic models of PICU mortality using Feudtner et al's and our modified CCC lists

Not for online publication:

Supplemental Table 6: A comparison of included and excluded admissions across clinical and demographic characteristics

**Table 4. Adjusted odds ratios for predictor variables in hierarchical logistic models of PICU mortality using PRISM III**

| Variable                                               | Mortality        |         |
|--------------------------------------------------------|------------------|---------|
|                                                        | OR (95% CI)      | P value |
| Chronic conditions (reference is no chronic condition) |                  |         |
| Cardiovascular                                         |                  |         |
| NCCC                                                   | 0.85 (0.64–1.13) | 0.27    |
| CCC                                                    | 1.42 (1.17–1.73) | <0.001  |
| Respiratory                                            |                  |         |
| NCCC                                                   | 0.72 (0.51–1.03) | 0.07    |
| CCC                                                    | 1.21 (0.94–1.56) | 0.13    |
| Neuromuscular                                          |                  |         |
| NCCC                                                   | 1.32 (0.84–2.07) | 0.22    |
| CCC                                                    | 2.4 (2–2.8)      | <0.001  |
| Congenital/genetic abnormality**                       |                  |         |
| Oncologic**                                            |                  |         |
| Metabolic/endocrinologic                               |                  |         |
| NCCC                                                   | 1.13 (0.39–3.85) | 0.84    |
| CCC                                                    | 1.36 (1.12–1.68) | 0.003   |
| Renal                                                  |                  |         |
| NCCC                                                   | 0.92 (0.39–2)    | 0.84    |
| CCC                                                    | 1.63 (1.12–2.4)  | 0.01    |
| Gastrointestinal                                       |                  |         |
| NCCC                                                   | 0.61 (0.19–2)    | 0.42    |
| CCC                                                    | 1.42 (1.11–1.82) | 0.005   |
| Hematologic/immunologic                                |                  |         |
| NCCC                                                   | –                | –       |
| CCC                                                    | 2.6 (2.1–3.3)    | <0.001  |
| Other                                                  |                  |         |
| NCCC                                                   | 0.76 (0.54–1.05) | 0.1     |
| CCC                                                    | 1.03 (0.49–2)    | 0.92    |
| Age                                                    |                  |         |
| 0–3 months (reference)                                 |                  |         |
| 3–24 months                                            | 0.88 (0.7–1.1)   | 0.25    |
| > 2 years                                              | 0.6 (0.49–0.75)  | <0.001  |
| Male gender                                            | 0.85 (0.73–0.98) | 0.024   |
| Trauma                                                 | 2.2 (1.7–2.8)    | <0.001  |
| PRISM III score                                        | 1.23 (1.22–1.24) | <0.001  |

\*\* Chromosomal abnormalities and oncologic were excluded due to collinearity with PRISM score, as this scoring system includes variables for these conditions.

CCC, complex chronic condition; NCCC, non-complex chronic condition; OR, odds ratios; PRISM, Pediatric Risk of Mortality

**Table 5. Comparison of adjusted odds ratios for predictor variables in hierarchical logistic models of PICU mortality using Feudtner et al's and our modified CCC lists**

| Variable                                | Feudtner         |         | Modified         |         |
|-----------------------------------------|------------------|---------|------------------|---------|
|                                         | OR (95% CI)      | P value | OR (95% CI)      | P value |
| CCC (reference is no chronic condition) |                  |         |                  |         |
| Cardiovascular                          | 0.98 (0.84–1.15) | 0.84    | 1.31 (1.11–1.55) | 0.002   |
| Respiratory                             | 1.16 (0.89–1.51) | 0.27    | 0.95 (.76–1.19)  | 0.64    |
| Neuromuscular                           | 0.9 (0.76–1.06)  | 0.19    | 1.49 (1.28–1.73) | <0.001  |
| Congenital/Genetic abnormality          | 1.36 (1.12–1.64) | 0.001   | 1.39 (1.09–1.76) | 0.007   |
| Oncologic                               | 2.2 (1.84–2.7)   | <0.001  | 2.6 (2.2–3.2)    | <0.001  |
| Metabolic/Endocrinologic                | 2.3 (1.7–3)      | <0.001  | 2.1 (1.75–2.6)   | <0.001  |
| Renal                                   | 1.94 (1.36–2.8)  | <0.001  | 1.88 (1.32–2.7)  | <0.001  |
| Gastrointestinal                        | 1.64 (1.17–2.3)  | 0.005   | 1.19 (0.95–1.49) | 0.12    |
| Hematologic/Immunologic                 | 1.87 (1.32–2.6)  | <0.001  | 2.9 (2.4–3.6)    | <0.001  |
| Age                                     |                  |         |                  |         |
| 0–3 months (reference)                  |                  |         |                  |         |
| 3–24 months                             | 0.89 (0.73–1.07) | 0.22    | 0.87 (0.72–1.05) | 0.15    |
| > 2 years                               | 0.86 (0.72–1.03) | 0.1     | 0.76 (0.63–0.92) | 0.004   |
| Male gender                             | 0.83 (0.73–0.94) | 0.003   | 0.84 (0.74–0.95) | 0.005   |
| Trauma                                  | 1.27 (1.03–1.56) | 0.024   | 1.52 (1.24–1.87) | <0.001  |
| PIM2 score                              | 2.7 (2.6–2.8)    | <0.001  | 2.6 (2.5–2.7)    | <0.001  |

CCC, complex chronic condition; OR, odds ratios; PIM, Pediatric Index of Mortality
